# Supplementary material for: OTULIN maintains skin homeostasis by controlling keratinocyte death and stem cell identity
Source: PubMed Central journal article supplement (PMC8501048; doi:10.1038/s41467-021-25944-2), 2021-10-08
Supplement: 41467_2021_25944_MOESM1_ESM.pdf [file 41467_2021_25944_MOESM1_ESM.pdf]

Supplementary Information for:

**OTULIN maintains skin homeostasis by controlling keratinocyte death and stem cell identity**

Esther Hoste, Kim Lecomte and Geert van Loo

Supplementary Figures 1-7

Supplementary Table 1 and 2

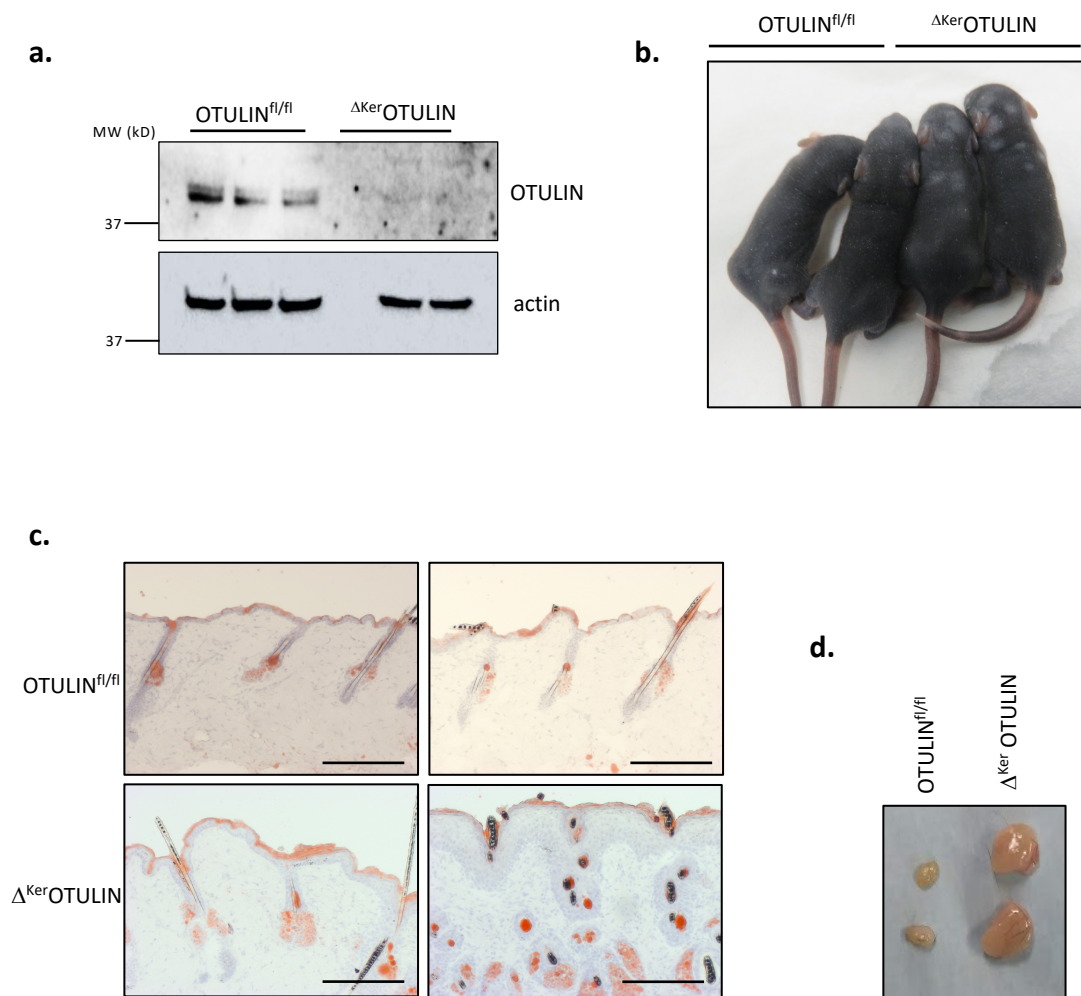

**Supplementary Figure 1.** **a.** Western blot analysis of OTULIN on lysates from PMK cultures isolated from OTULIN<sup>fl/fl</sup> and Δ<sup>Ker</sup>OTULIN mice **b.** Representative picture of P6 OTULIN<sup>fl/fl</sup> and Δ<sup>Ker</sup>OTULIN mice **c.** Oil Red O staining of skin sections obtained from back skin of 7-weeks old OTULIN<sup>fl/fl</sup> and Δ<sup>Ker</sup>OTULIN mice. Scale bars: 100 μm. **d.** Representative photograph of inguinal lymph nodes of 7-weeks old mice of the indicated genotypes.



OTULIN<sup>fl/fl</sup> $\Delta^{Ker}$ OTULIN (NL) $\Delta^{Ker}$ OTULIN (L)

a.

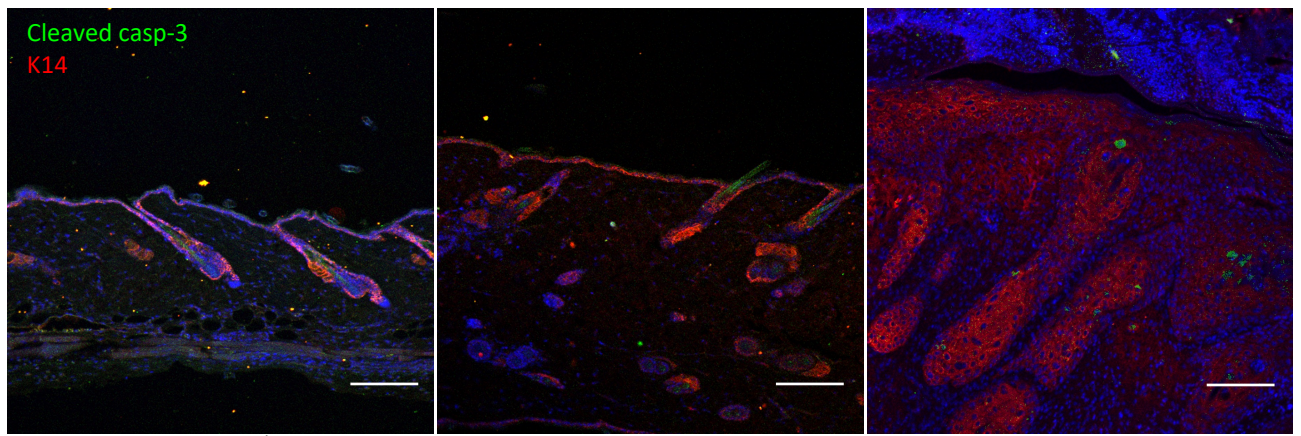OTULIN<sup>fl/fl</sup> $\Delta^{Ker}$ OTULIN (NL) $\Delta^{Ker}$ OTULIN (L)

b.

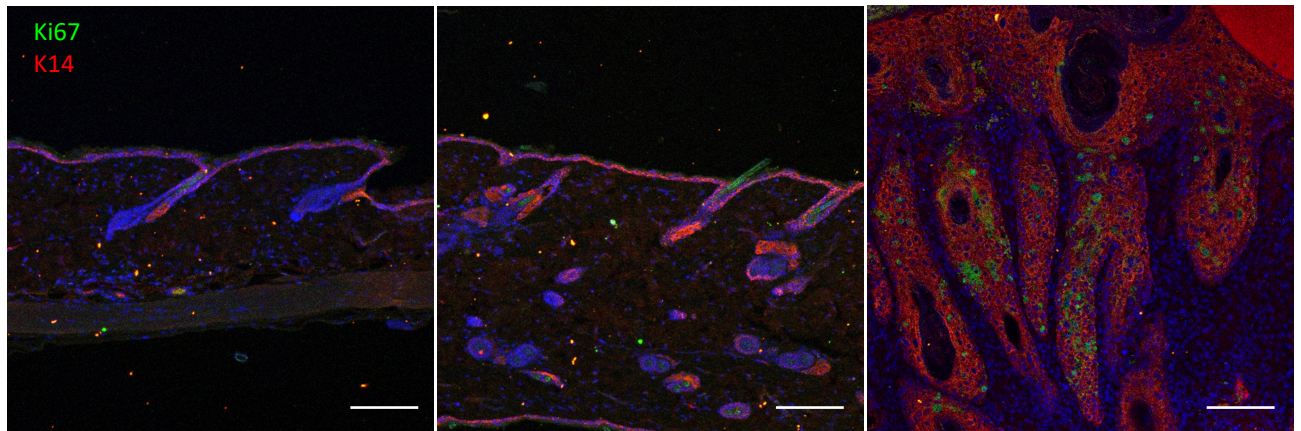

c.

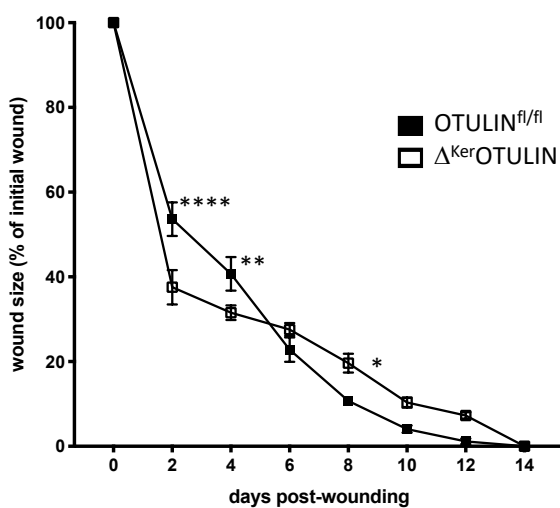

d.

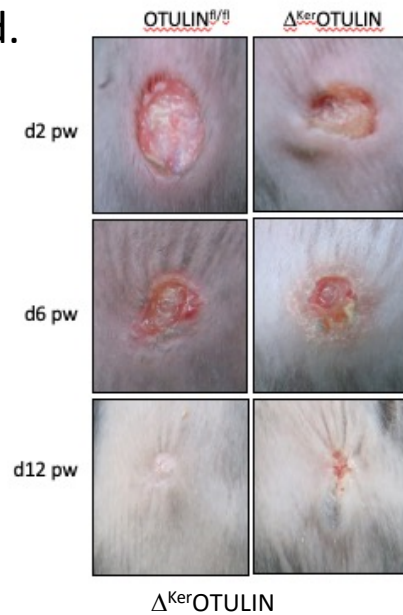

e.

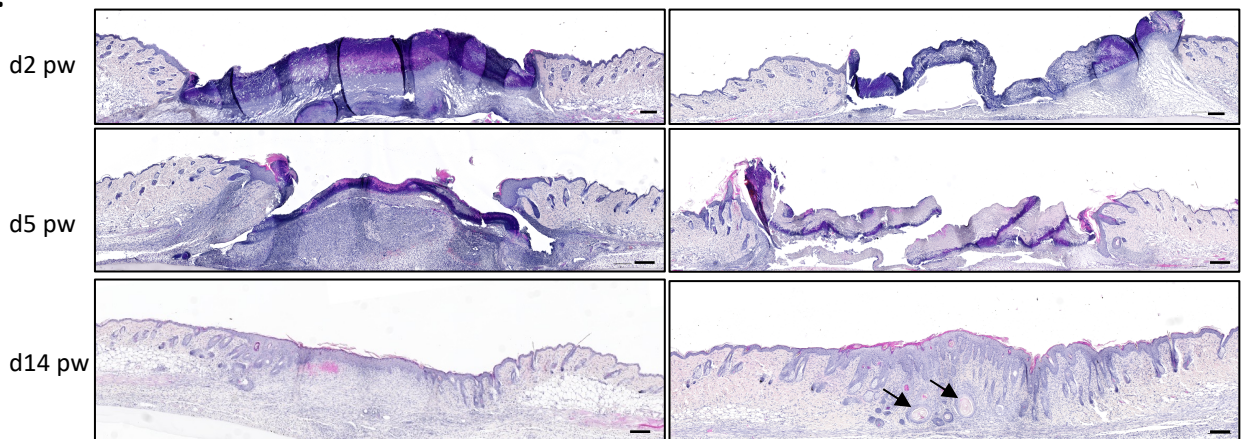

**Supplementary Figure 2.** **a.** Immunofluorescent staining of skin sections from 7-week old OTULIN<sup>fl/fl</sup> mice and non-lesional (NL) and lesional (L) skin of  $\Delta^{Ker}$ OTULIN mice with antibodies against cleaved caspase-3 (green), keratin-14 (red) and nuclear staining with Dapi. Scale bar: 100  $\mu$ m. **b.** Immunofluorescent staining of skin sections from 7-week old OTULIN<sup>fl/fl</sup> mice and non-lesional (NL) and lesional (L) skin of  $\Delta^{Ker}$ OTULIN mice with antibodies against Ki-67 (green), keratin-14 (red) and nuclear staining with Dapi. Scale bar: 100  $\mu$ m. **c.** Wound healing dynamics in OTULIN<sup>fl/fl</sup> (n=8 mice) and  $\Delta^{Ker}$ OTULIN (n=6 mice) mice that were wounded at 7-weeks old (\* p=0.036; \*\* p=0.00284; \*\*\*\* p<0.0001; Two-way ANOVA with multiple comparisons). Data represent means  $\pm$  SEM. Scale bar: 200  $\mu$ m. **d.** Representative photographs of wounds of OTULIN<sup>fl/fl</sup> and  $\Delta^{Ker}$ OTULIN mice at the indicated time-points post wounding (pw). **e.** H&E-stained sections of wounds OTULIN<sup>fl/fl</sup> and  $\Delta^{Ker}$ OTULIN mice at the indicated days pw. Scale bars: 200  $\mu$ m.



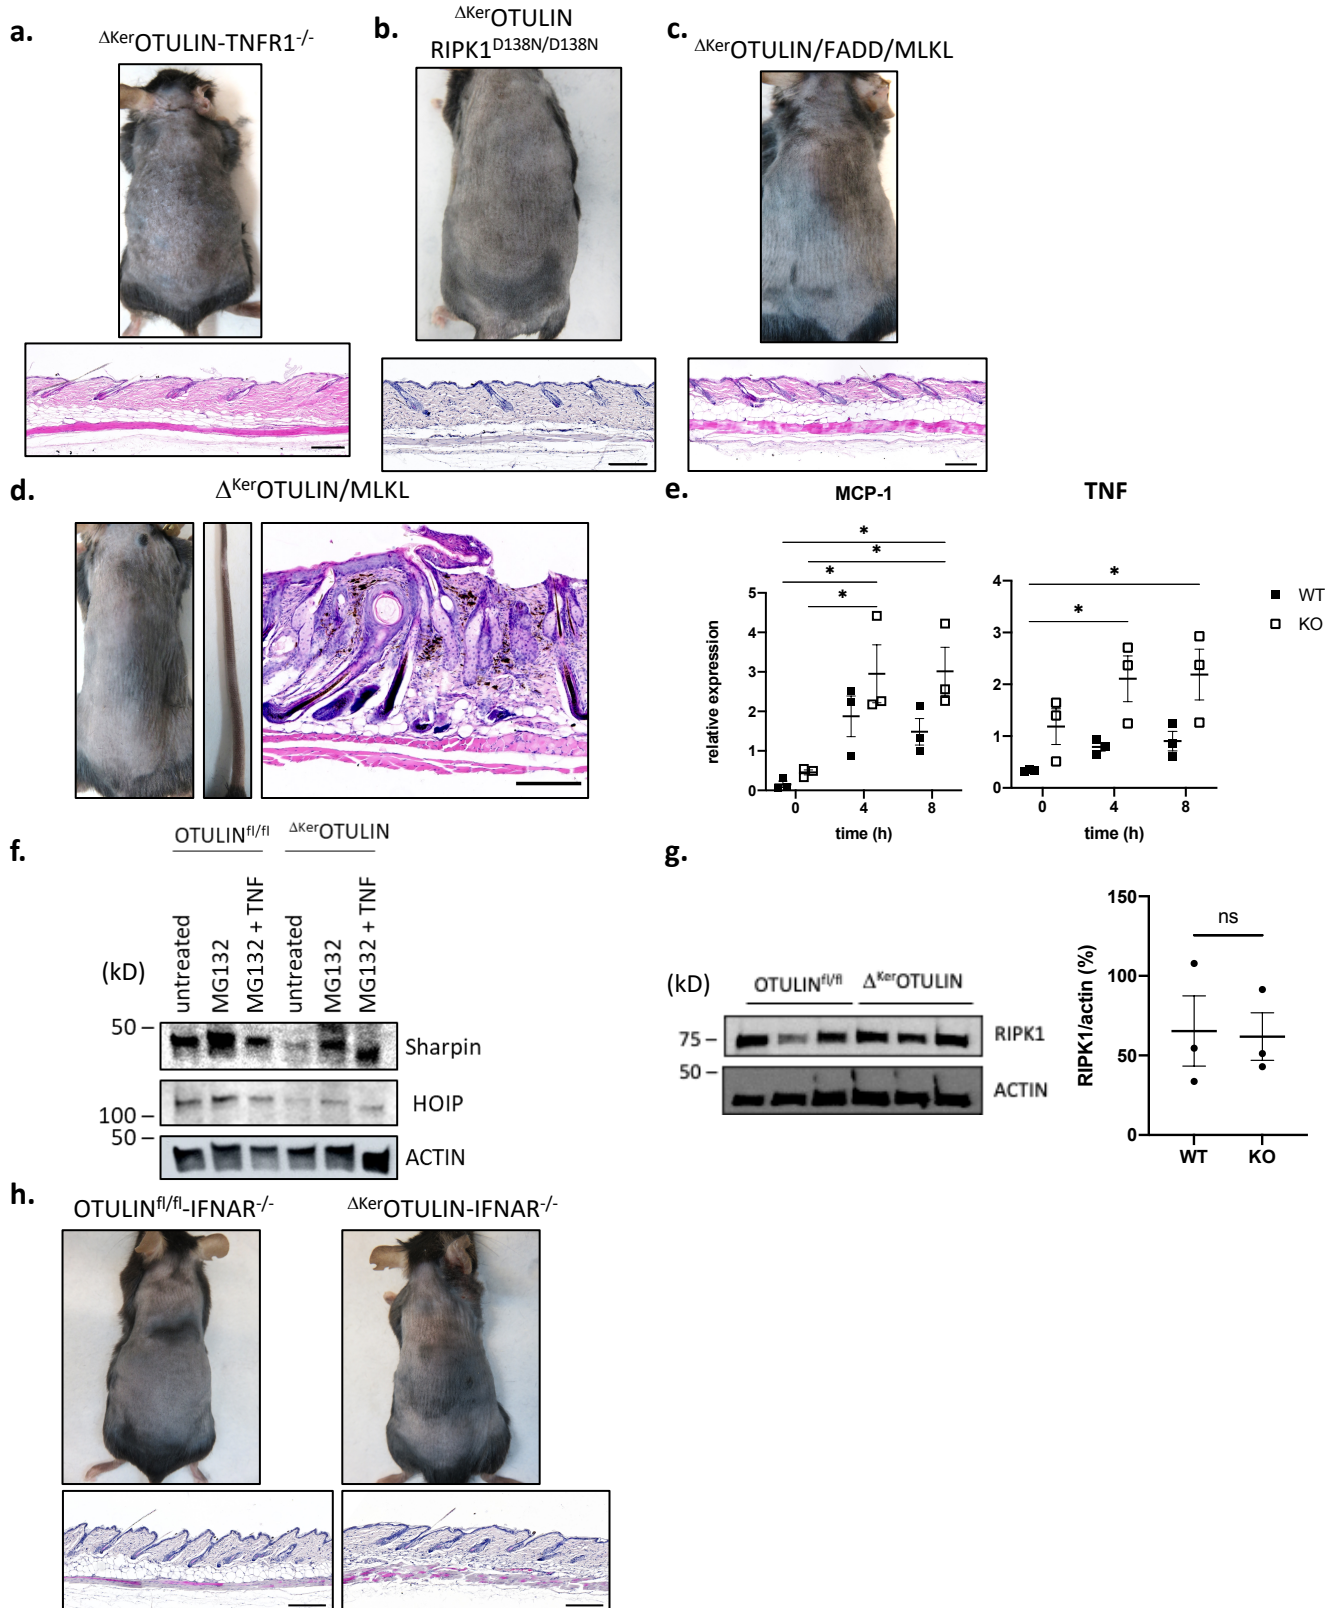

**Supplementary Figure 3.** **a.** Representative images and H&E-stained skin sections of 42-weeks old  $\Delta^{Ker}OTULIN-TNFR1^{-/-}$  mice. **b.** Representative images and H&E-stained skin sections of 42-weeks old  $\Delta^{Ker}OTULIN-RIPK1^{D138N/D138N}$  mice. **c.** Representative images and H&E-stained skin sections of 40-weeks old  $\Delta^{Ker}OTULIN/FADD/MLKL$  mice. **d.** Representative images and H&E-stained skin sections of 8-weeks old  $\Delta^{Ker}OTULIN/MLKL$  mice. Scale bars for panel a to d: 200  $\mu$ m. **e.** Relative mRNA expression of MCP-1 and TNF in lysates of OTULIN<sup>fl/fl</sup> (WT; n=3) and  $\Delta^{Ker}OTULIN$  (KO; n=3) PMKs. Data represent means  $\pm$  SEM. (\* p < 0.05; Two-way ANOVA with multiple comparisons). **f.** Western blot analysis on lysates from PMK cultures isolated from OTULIN<sup>fl/fl</sup> and  $\Delta^{Ker}OTULIN$  mice that were treated with or without TNF in the presence of the proteasome inhibitor MG132 (20 mM). **g.** Immunoblotting for RIPK1 in epidermal tail lysates of OTULIN<sup>fl/fl</sup> and  $\Delta^{Ker}OTULIN$  mice and associated densitometry analysis relative to  $\beta$ -actin levels. **h.** Representative images and H&E-stained skin sections of 40-weeks old OTULIN<sup>fl/fl</sup> IFNAR<sup>-/-</sup> and  $\Delta^{Ker}OTULIN$  IFNAR<sup>-/-</sup> mice. Scale bar: 200  $\mu$ m.

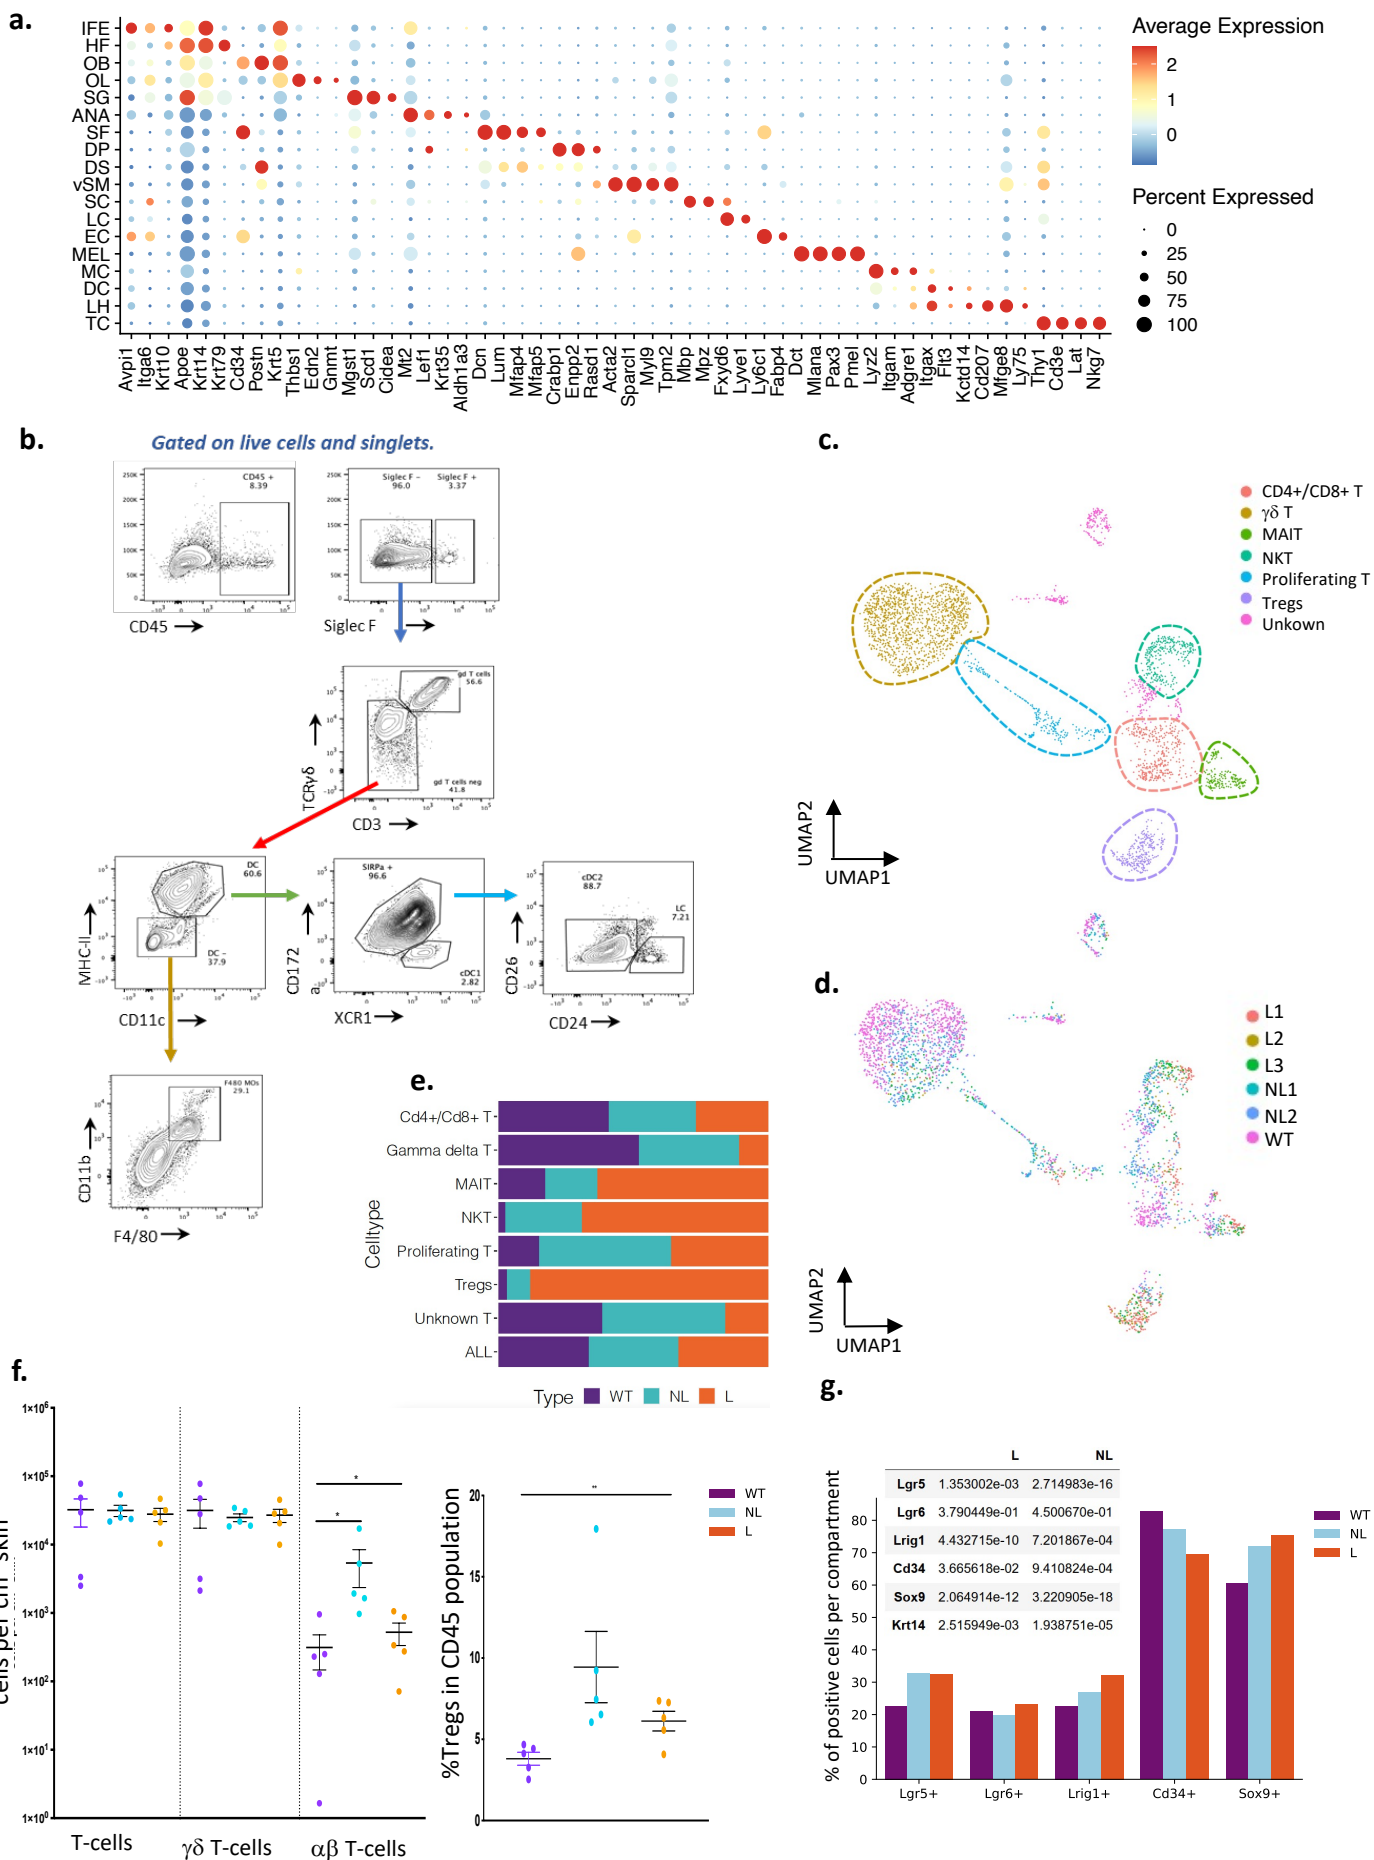

**Supplementary Figure 4. a.** Dot plot showing expression of selected differentially expressed genes per annotated cluster as adapted from Joost et al. [35]. The dot size represents the percentage of cells expressing the gene, and the color represents the average expression of that gene within a cluster. **b.** Gating strategy for flow cytometric analysis of immune cell-types infiltrating the skin. **c.** UMAP plot of annotated

T-cell subcluster, showing several assigned clusters by unbiased clustering. Tregs segregate based on differential *Foxp3*, *CD4* and *IL10* gene expression. CD8 T-cells segregate in a cluster together with CD4 T-cells identified by *CD8* or *CD4* expression,  $\gamma\delta$  T-cells were identified by lack of *CD8* and *CD4* expression. **d.** Distribution of WT, NL and L cells within the T-cell subclusters. **e.** Relative normalized T-cell frequencies of the indicated populations in the different conditions. **f.** Flow cytometric analysis of T-cell composition in control OTULIN<sup>fl/fl</sup> skin (WT, n=5 mice) and non-lesional (NL) and lesional (L) skin of  $\Delta^{\text{ker}}$ OTULIN mice (n=5 mice per condition). The absolute number of T-cells per cm<sup>2</sup> skin is plotted. Right panel depicts the percentage of FoxP3-positive Tregs within the CD45 population, data represent means  $\pm$  SEM (\* p<0.05; \*\* p=0.0079; Mann-Whitney two-sided testing). **g.** Percentage of cells positive for the indicated markers present in the permanent part of the epidermis (incl. IFE, SG, uHF and HF bu) and associated p-value (Chi-squared test, comparing L or NL gene frequencies to expected frequencies from WT).

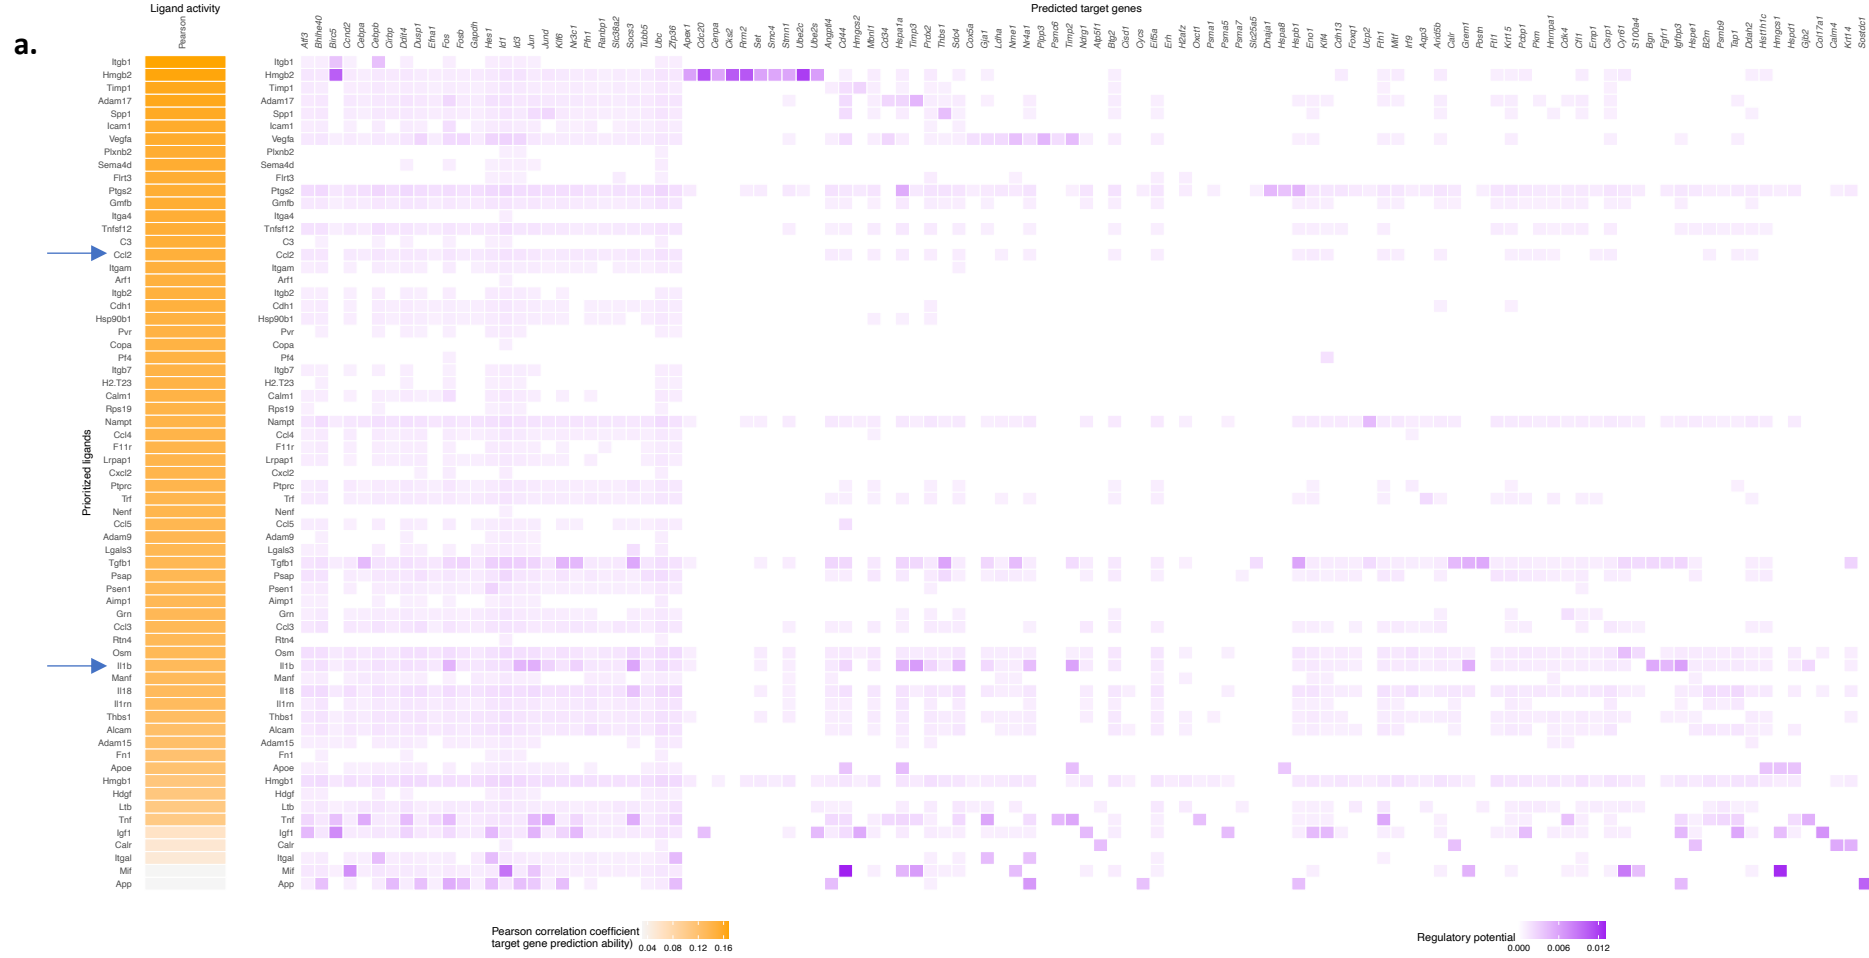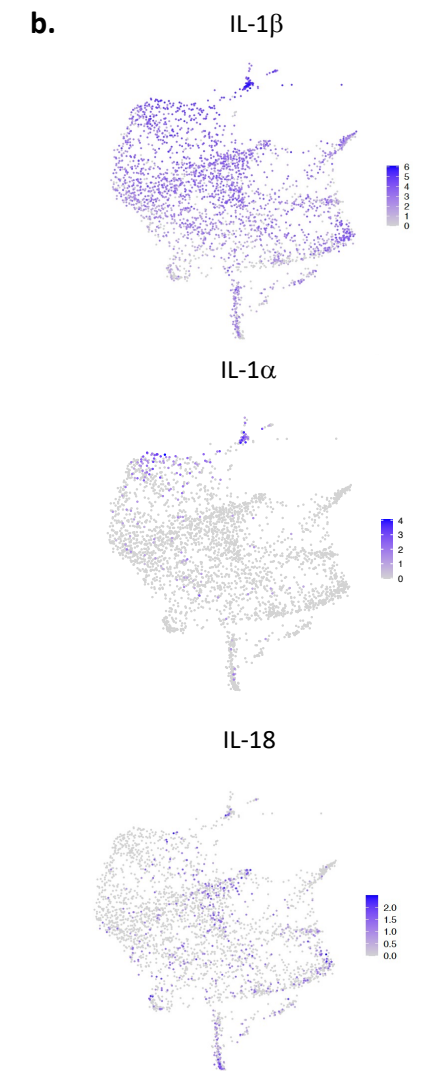

**Supplementary Figure 5. a.** Schematic representation of NicheNet analysis identifying ligands secreted by innate immune cells that bind on receptors in keratinocytes, mediating gene expression changes. Non-lesional  $\Delta^{ker}$ OTULIN skin is compared to WT skin. CCL2 (MCP-1) and IL-1b are indicated with an arrow. **b.** Feature plot of IL-1 $\beta$ , IL-1 $\alpha$  and IL-18 mRNA expression levels in innate immune cells, as determined by scRNAseq.

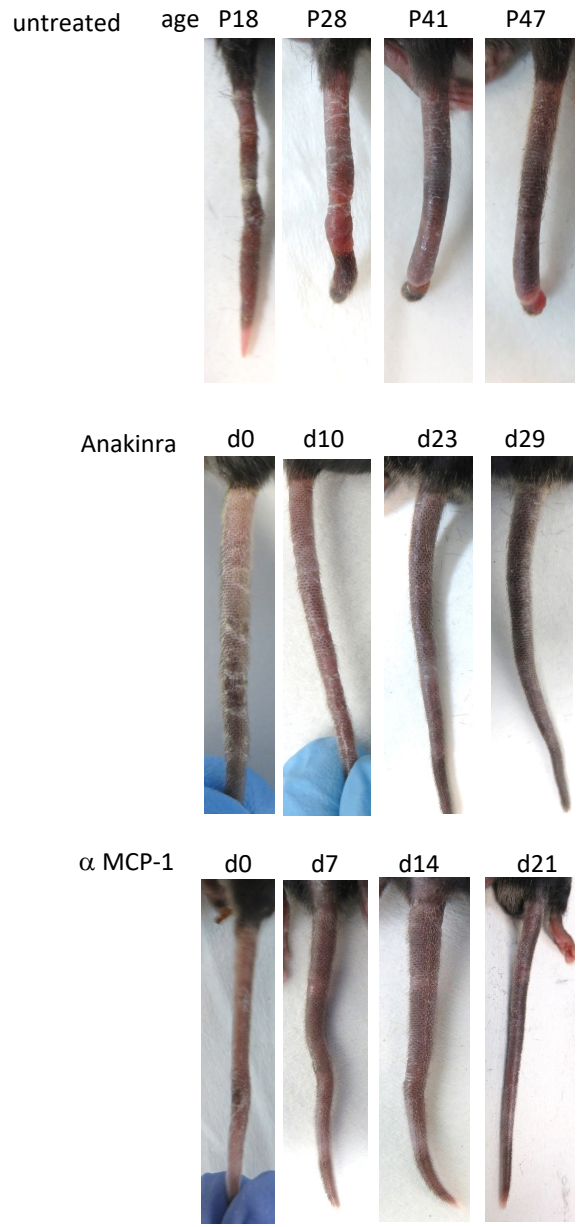

**Supplementary Figure 6.** Representative pictures of tail of  $\Delta^{ker}$  OTULIN mice treated with daily injections of 300 mg/kg Anakinra or 40 mg/kg  $\alpha$ -MCP-1 antibody twice weekly, and untreated controls. Duration of treatment is indicated.

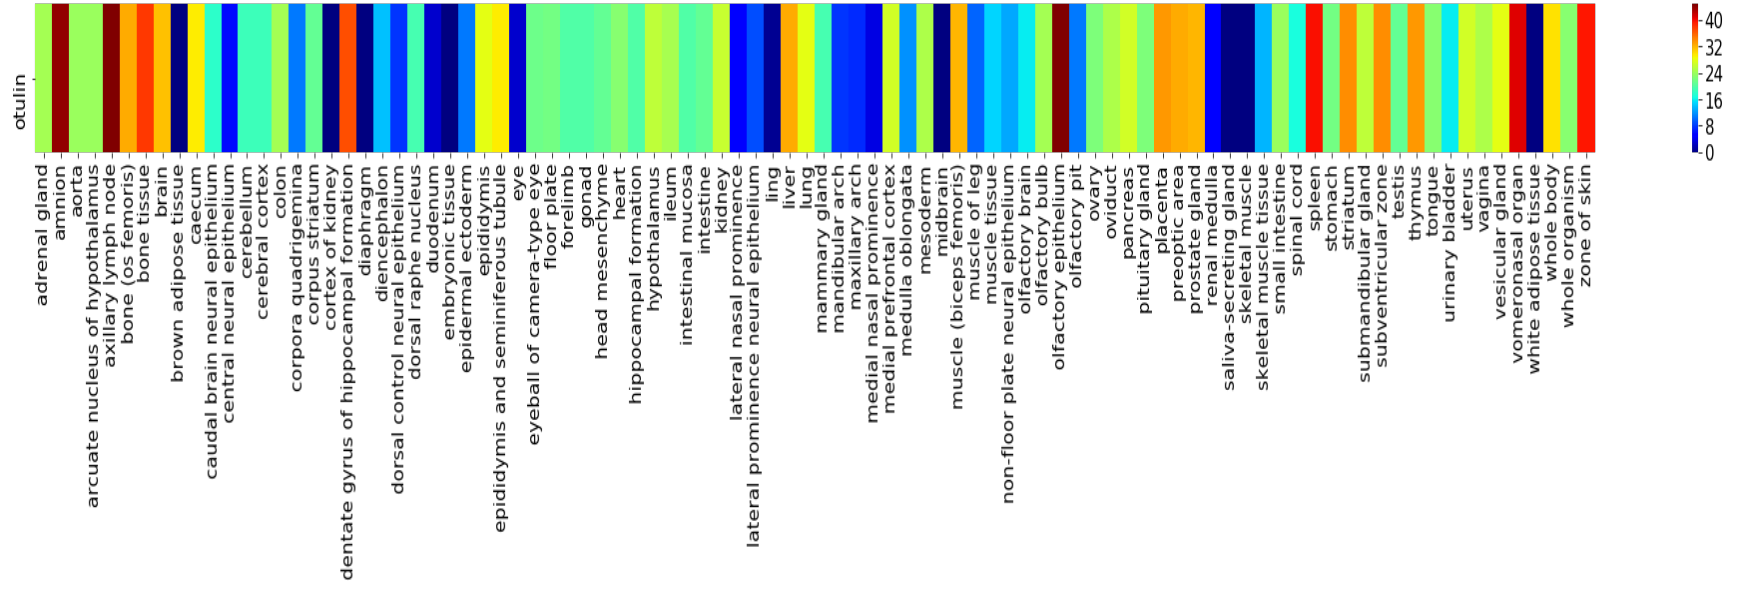

**Supplementary Figure 7.** Average *OTULIN* mRNA expression levels in different tissues of the mouse, as assessed by the EBI tissue expression atlas.

| Antibodies                   | Cat #                      | company                    | dilution | application           |
|------------------------------|----------------------------|----------------------------|----------|-----------------------|
| Anti-MCP-1                   | BE0185                     | InVivoMab                  | 40 mg/kg | Therapeutic treatment |
| CD24-eFluor450               | 48024282 (clone M1/69)     | eBioscience                | 1/200    | Flow cytometry        |
| CD3-PacBlue                  | 100214 (clone 17A2)        | Biolegend                  | 1/100    | Flow cytometry        |
| CD127a-PerCP-eFluor710       | 46172182 (clone P84)       | eBioscience                | 1/200    | Flow cytometry        |
| CD11b-BV605                  | 563015 (clone M1/70)       | BD Bioscience              | 1/200    | Flow cytometry        |
| cD11c-BV711                  | cD11c-BV711                | BD Pharmingen              | 1/200    | Flow cytometry        |
| F4/80-BV785                  | 123141 (clone BM8)         | Biolegend                  | 1/400    | Flow cytometry        |
| CD45-AF700                   | 56045182 (clone 30-F11)    | eBioscience                | 1/400    | Flow cytometry        |
| MHCII-APC-eFluor780          | 47532182 (clone M5/114152) | eBioscience                | 1/400    | Flow cytometry        |
| Siglec-F-PE                  | 552126 (clone E502440)     | BD Pharmingen              | 1/1000   | Flow cytometry        |
| B220-PE-Cy5                  | 553091 (clone RA36B2)      | BD Pharmingen              | 1/500    | Flow cytometry        |
| CD317-PE-Cy7                 | 25317282 (clone eBio927)   | eBioscience                | 1/200    | Flow cytometry        |
| CD3-BUV395                   | 563565 (clone 1452C11)     | BD Bioscience              | 1/100    | Flow cytometry        |
| TCRb chain PE/Cy7            | 109222 (clone H57597)      | Biolegend                  | 1/300    | Flow cytometry        |
| FoxP3-APC                    | 17577382                   | eBioscience                | 1/100    | Flow cytometry        |
| TCR $\gamma\delta$ -AF488    | 118128 (clone GL3)         | Biolegend                  | 1/200    | Flow cytometry        |
| Fc block CD16/CD32           | 553142 (clone 2.4G2)       | BD Bioscience              | 1/400    | Flow cytometry        |
| Filaggrin                    | PRB-417P                   | Covance                    | 1/1000   | immunofluorescence    |
| F4/80                        | MCA497G                    | AbD serotec                | 1/1000   | immunofluorescence    |
| CD11b-PE                     | 12-0112-81 (clone M1/70)   | eBioscience                | 1/300    | immunofluorescence    |
| CD45                         | 550539 (clone 30-F11)      | BD Pharmingen              | 1/500    | immunofluorescence    |
| Keratin-6A                   | PRB-169P                   | Biolegend                  | 1/1000   | immunofluorescence    |
| Keratin-14                   | Ab7800 (clone LL002)       | Abcam                      | 1/1000   | immunofluorescence    |
| Ki-67                        | 12202 (clone D3B5)         | Cell Signalling Technology | 1/1000   | immunofluorescence    |
| Cleaved casp-3               | 9661                       | Cell Signalling Technology | 1/1000   | immunofluorescence    |
| Donkey-anti-mouse AF488      | A-21202                    | Thermofisher               | 1/2000   | immunofluorescence    |
| Goat-anti-rabbit DyLight 555 | 84541                      | Thermofisher               | 1/2000   | immunofluorescence    |
| Donkey-anti-rabbit AF488     | A21206                     | Thermofisher               | 1/2000   | immunofluorescence    |
| Goat-anti-mouse DyLight 555  | 84540                      | Thermofisher               | 1/2000   | immunofluorescence    |



|                               |                |                                  |         |                  |
|-------------------------------|----------------|----------------------------------|---------|------------------|
| OTULIN                        | 14127          | Cell Signalling Technology       | 1/1000  | Western blotting |
| JNK                           | 554285         | BD Bioscience                    | 1/1000  | Western blotting |
| phospho-JNK                   | PS1019         | Millipore                        | 1/1000  | Western blotting |
| I $\kappa$ B $\alpha$         | sc371          | Santa Cruz Biotechnology         | 1/1000  | Western blotting |
| phospho-I $\kappa$ B $\alpha$ | 9246           | Cell Signalling Technology       | 1/1000  | Western blotting |
| p38 MAPK                      | CST9212        | Cell Signalling Technology       | 1/1000  | Western blotting |
| phospho-p38 MAPK              | CST9215        | Cell Signalling Technology       | 1/1000  | Western blotting |
| HOIL-1                        |                | kind gift of Dr. Henning Walczak | 1/2000  | Western blotting |
| HOIP                          |                | kind gift of Dr. Rune Damgaard   | 1/1000  | Western blotting |
| SHARPIN                       | 14626-1-AP     | Proteintech                      | 1/1000  | Western blotting |
| RIPK1                         | 3493           | Cell Signalling Technology       | 1/2000  | Western blotting |
| linear ubiquitin              | MABS451 (LUB9) | Millipore                        | 1/2500  | Western blotting |
| caspase-3                     | 9662           | Cell Signalling Technology       | 1/1000  | Western blotting |
| actin-HRP                     | sc-47778       | Santa Cruz Biotechnology         | 1/10000 | Western blotting |
| anti-rabbit HRP               | NA931          | Amersham                         | 1/2500  | Western blotting |
| anti-mouse HRP                | NA934          | Amersham                         | 1/2500  | Western blotting |
| anti-goat HRP                 | Sc-2354        | Amersham                         | 1/2500  | Western blotting |

Supplementary Table 1. List of used antibodies

| Gene           | Forward primer          | Reverse primer            |
|----------------|-------------------------|---------------------------|
| Cxcl10         | CCAAGTGCTGCCGTCATTTTC   | GGCTCGCAGGGATGATTTCAA     |
| GAPDH          | TGAAGCAGGCATCTGAGGG     | CGAAGGTGGAAGAGTGGGAG      |
| Ifitm3         | TGTTACACCTGCGTGTAGGG    | GATGGTGGGTGATGTGACTG      |
| Ifna2          | GCCATCCCTGTGCTGCGAGA    | GCAGCAGATGAAGCCTTTGATGTGA |
| Ifnb1          | AGCTCCAAGAAAGGACGAACA   | GCCCTGTAGGTGAGGTTGAT      |
| IL13           | TGTGTAGCTGAGCAGTTTTGT   | TTCTGTGTAGCCCTGGATTCC     |
| IL4            | TGGA CTCATTCATGGTGCAG   | AACATGGGAAA ACTCCATGC     |
| IL6            | GAGGATACCACTCCCAACAGACC | AAGTGCATCATCGTTGTT CATACA |
| Isg15          | ACGGTCTTACCC TTTCCAGTC  | CCCCTTTCGTTCCCTCACCAG     |
| MCP-1          | TTAAAAACCTGGATCGGAACCAA | GCATTAGCTTCAGATTTACGGGT   |
| Mx1            | GACCATAGGGGTCTTGACCAA   | AGACTTGCTCTTTCTGAAAAGCC   |
| S100A8         | ATCCTTTGTCAGCTCCGTCTT   | TGTAGAGGGCATGGTGATTTTC    |
| $\beta$ -actin | GCTTCTAGGCGGACTGTTACTGA | GCCATGCCAATGTTGTCTCTTAT   |
| TNF            | ACCCTGGTATGAGCCCATATAC  | ACACCCATTCCCTTCACAGAG     |

Supplementary Table 2: List of used primers
